# Supplementary material for: Role of Environmental Quality of Life in Physical Activity Status of Individuals with and without Physical Disabilities in Saudi Arabia
Source: MDPI journal article supplement (doi:10.3390/ijerph19074228), 2022-04-01
Supplement: s1 [file s1]

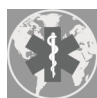

**Supplementary Table S1.** Background characteristics and physical activity status of the study population.  
(Univariate analysis).

| Background Variables     | Total (n = 359) | MET-Minutes Less Than<br>600 <sup>1</sup> | MET-Minutes<br>More Than 600 <sup>2</sup> | <i>p</i> value |
|--------------------------|-----------------|-------------------------------------------|-------------------------------------------|----------------|
|                          | n (%)           | n (%)                                     | n (%)                                     |                |
| Total                    | 359(100)        | 194(54)                                   | 165(46)                                   |                |
| <b>Gender</b>            |                 |                                           |                                           |                |
| Males                    | 114(31.8)       | 56(28.9)                                  | 58(35.2)                                  | 0.20           |
| Females                  | 245(68.2)       | 138(71.1)                                 | 107(64.8)                                 |                |
| <b>Age (years)</b>       |                 |                                           |                                           |                |
| Young(15-35)             | 214(59.6)       | 121(62.4)                                 | 93(56.4)                                  | 0.46           |
| Middle age(36-55)        | 94(26.2)        | 46(23.7)                                  | 48(29.1)                                  |                |
| Elder(55+)               | 51(14.2)        | 27(13.9)                                  | 24(14.5)                                  |                |
| <b>Education level</b>   |                 |                                           |                                           |                |
| No education             | 31(8.6)         | 19(9.8)                                   | 12(7.3)                                   | 0.69           |
| Primary/Secondary        | 168(46.8)       | 89(45.9)                                  | 79(47.9)                                  |                |
| College/University       | 160(44.6)       | 86(44.3)                                  | 74(44.8)                                  |                |
| <b>Marital status</b>    |                 |                                           |                                           |                |
| Unmarried                | 182(50.7)       | 100(51.5)                                 | 82(49.7)                                  | 0.73           |
| Married                  | 177(49.3)       | 94(48.5)                                  | 83(50.3)                                  |                |
| <b>Disability status</b> |                 |                                           |                                           |                |
| Non-disabled             | 243(67.7)       | 135(69.6)                                 | 108(65.5)                                 | 0.40           |
| Disabled                 | 116(32.3)       | 59(30.4)                                  | 57(34.5)                                  |                |
| <b>Chronic disease</b>   |                 |                                           |                                           |                |
| No                       | 270(75.2)       | 152(78.4)                                 | 118(71.5)                                 | 0.14           |
| Yes                      | 89(24.8)        | 42(21.6)                                  | 47(28.5)                                  |                |

<sup>1</sup> Not meeting WHO recommendation for physical activity; <sup>2</sup> Meeting WHO recommendation for physical activity.
